# Supplementary material for: Dipolar extracellular potentials generated by axonal projections
Source: eLife journal article supplement (doi:10.7554/elife.26106), 2017-09-05
Supplement: supp [file elife-26106-supp-v1.zip]

Archive with 2 entries (2 files):
- elife_poa_e26106_Transparent_Reporting_File.pdf
- elife_poa_e26106_Revised_Manuscript_Source.tex
